# Supplementary material for: Predictive Methodology for Quality Assessment in Injection Molding Comparing Linear Regression and Neural Networks
Source: MDPI journal article supplement (doi:10.3390/polym15193915), 2023-09-28
Supplement: s1 [file s1]

## Supplementary Materials

# Predictive Methodology for Quality Assessment in Injection Molding Comparing Linear Regression and Neural Networks

Angel Fernández \*, Isabel Clavería, Carmelo Pina and Daniel Elduque

Department of Mechanical Engineering, University of Zaragoza EINA, María de Luna, 3 50018 Zaragoza, Spain; iclaver@unizar.es (I.C.); carpina@unizar.es (C.P.); delduque@unizar.es (D.E.)

\* Correspondence: afernan@unizar.es; Tel.: +34-629786393

**Table S1.** Predictive model coefficients for Min. Flow Front Temperature, Max. Molding Pressure, Max. Volumetric Shrinkage and Average Linear Distortion, part weight dimension 1 and 2.

| Term           | Tmin       | Pmax       | VShrk     | Distor    | Weight    | Dim1     | Dim2      |
|----------------|------------|------------|-----------|-----------|-----------|----------|-----------|
| intercept      | 26.316827  | 4854.9032  | 23.645124 | 0.909752  | 327.1799  | 516.8223 | 271.96927 |
| A              | 67.981888  | 691.2438   | 2.566796  | −0.311249 | 3.2150    | 2.13932  | 0.00379   |
| A <sup>2</sup> | 0          | 0          | 0         | 0         | 0         | 0        | 0         |
| B              | 0.626692   | −28.3975   | −0.202042 | 0.003325  | 0.0346    | 0.04116  | −0.00035  |
| B <sup>2</sup> | 0.000617   | 0.0436     | 0.000578  | −0.000008 | 0         | 0        | 0         |
| C              | −0.647687  | −13.9774   | 0.050656  | 0.003574  | 0.0191    | 0.07299  | −0.00370  |
| C <sup>2</sup> | 0          | 0          | 0         | 0         | 0         | 0        | 0         |
| D              | −2.433563  | −21.8872   | 0.907790  | 0.010438  | −0.1431   | −0.02904 | −0.03198  |
| D <sup>2</sup> | 0          | 0          | 0         | 0         | 0         | 0        | 0         |
| E              | −0.075673  | −0.6696    | 0.012736  | −0.000573 | −0.0138   | 0.009653 | 0.00229   |
| E <sup>2</sup> | 0          | 0          | 0         | 0         | 0         | 0        | 0         |
| F              | 0.540182   | 8.6209     | 0.091325  | 0.001133  | −0.0116   | −0.05974 | −0.00358  |
| F <sup>2</sup> | 0          | 0          | 0         | 0         | 0         | 0        | 0         |
| G              | 22.973892  | −2202.8648 | −4.546871 | 0.509376  | −216.5400 | −2.02030 | 0.48474   |
| G <sup>2</sup> | 0          | 0          | 0         | 0         | 0         | 0        | 0         |
| H              | −31.182648 | −1541.4846 | −4.595055 | −0.000874 | 30.3008   | 3.30289  | 0.79147   |
| H <sup>2</sup> | 0          | 0          | 0         | 0         | 0         | 0        | 0         |
| A.B            | −0.364967  | −1.1637    | 0.001567  | 0.000585  | −0.0059   | −0.00533 | −0.00044  |
| A.C            | −0.219922  | −6.9725    | −0.022066 | 0.001610  | −0.0119   | −0.00729 | 0.00427   |
| A.D            | −0.471409  | −1.5643    | 0.076590  | 0.001222  | −0.0102   | 0.03840  | 0.00060   |
| A.E            | −0.006525  | −0.0099    | −0.002824 | 0.000104  | −0.0010   | −0.00203 | −0.00015  |
| A.F            | 0.074574   | 0.1136     | −0.048057 | −0.000572 | −0.0038   | 0.01516  | 0.00034   |
| A.G            | −0.908029  | −574.2546  | −1.791098 | 0.196788  | −0.8630   | −0.54199 | 0.32004   |
| A.H            | −4.039231  | −90.8899   | 0.578023  | 0.107964  | −1.0797   | −1.32031 | −0.20194  |
| B.C            | 0.003383   | 0.0662     | −0.000113 | −0.000005 | 0         | −0.00014 | −0.00004  |
| B.D            | 0.001237   | 0.0292     | −0.003289 | −0.000015 | 0.0003    | 0.00001  | 0.00016   |
| B.E            | 0.000037   | 0.0009     | −0.000039 | −0.000001 | 0         | 0        | 0         |
| B.F            | −0.000424  | −0.0100    | −0.000157 | −0.000002 | 0         | 0.00006  | 0         |
| B.G            | 0.692701   | 4.9660     | 0.028213  | −0.001768 | 0.0118    | 0.00415  | −0.00149  |

|     |           |            |            |           |         |          |          |
|-----|-----------|------------|------------|-----------|---------|----------|----------|
| B.H | −0.050349 | 4.1005     | 0.018952   | −0.000162 | −0.0057 | −0.00955 | −0.00210 |
| C.D | 0.055078  | 0.3176     | −0.001365  | −0.000025 | 0.0003  | −0.00240 | −0.00023 |
| C.E | 0.001386  | 0.0082     | −0.000030  | −0.000008 | 0       | 0.00005  | 0.00001  |
| C.F | −0.015837 | −0.0941    | 0.001434   | 0.000032  | 0       | −0.00029 | −0.00002 |
| C.G | −2.116753 | 19.5851    | 0.130351   | −0.005706 | 0.0176  | 0.02420  | −0.01253 |
| C.H | 1.823739  | 17.8154    | −0.044868  | −0.003356 | 0.0043  | −0.00785 | −0.01113 |
| D.E | −0.001184 | 0.0035     | −0.000462  | −0.000005 | 0       | 0        | −0.00001 |
| D.F | 0.013527  | −0.0404    | −0.004137  | −0.000164 | 0.0024  | 0.00227  | 0.00039  |
| D.G | 1.644937  | 15.3552    | −0.032943  | −0.002093 | 0.1362  | 0.07272  | 0.00546  |
| D.H | −4.168237 | −41.7288   | 0.244673   | 0.007135  | −0.0314 | 0.16416  | 0.04854  |
| E.F | 0.000406  | −0.0012    | 0.000028   | 0.000002  | 0       | −0.00001 | 0        |
| E.G | 0.049348  | 0.4607     | −0.005684  | −0.000438 | 0.0082  | 0.00422  | 0.00132  |
| E.H | −0.098387 | −1.1224    | 0.001680   | 0.000011  | 0.0002  | −0.00365 | 0.00065  |
| F.G | −0.563978 | −5.2646    | −0.042009  | 0.002146  | −0.0524 | −0.03537 | −0.01062 |
| F.H | 1.124427  | 12.8276    | −0.056073  | −0.003698 | 0.0057  | 0.05519  | −0.00470 |
| G.H | 73.114755 | −1854.4732 | −11.734558 | −0.316956 | 5.4530  | 9.38515  | −0.22269 |

**Table S2.** Weight and bias between input layer and hidden layer (BPNN<sub>1</sub>).

| Term  | LW01    | LW02    | LW03    | LW04    | LW05    | LW06    | LW07    | LW08    |
|-------|---------|---------|---------|---------|---------|---------|---------|---------|
| Bias1 | −0.0115 | 4.4193  | −0.3722 | 0.1870  | 3.6246  | 0.9251  | 1.1954  | 2.2300  |
| I1    | 0.0162  | −0.9191 | −0.9593 | −0.0019 | −0.8122 | −0.0114 | −0.0147 | −0.0481 |
| I2    | −0.1088 | 2.1555  | 0.3239  | 0.0763  | 1.7791  | −0.6050 | 0.1924  | 0.4202  |
| I3    | 0.0145  | 0.7844  | −0.0082 | 0.0114  | 0.7014  | −0.1163 | 0.0370  | −0.1068 |
| I4    | 0.0182  | 0.0457  | −0.0243 | 0.0025  | 0.0747  | −0.0017 | 0.0083  | 0.0057  |
| I5    | 0.0229  | 0.0222  | −0.0251 | 0.0034  | 0.0326  | 0.0029  | 0.0081  | 0.0094  |
| I6    | −0.0100 | −0.0285 | 0.0243  | −0.0007 | −0.0430 | 0.0004  | −0.0083 | −0.0094 |
| I7    | 0.9363  | 1.6317  | −0.5188 | 0.2421  | 1.3941  | 0.0032  | 0.7922  | 1.7902  |
| I8    | 0.1200  | 0.1567  | −0.9202 | 0.0579  | 0.0422  | −0.0778 | −0.2872 | −0.6703 |

**Table S3.** Weight and bias between hidden layer and output layer (BPNN<sub>1</sub>).

| Term  | OW01    | OW02    | OW03    | OW04    | OW05    | OW06    | OW07    |
|-------|---------|---------|---------|---------|---------|---------|---------|
| Bias2 | −1.1487 | 0.4542  | −0.3564 | −0.0274 | 0.1885  | 0.0189  | −0.1157 |
| LW01  | −0.7271 | 0.7574  | −0.1560 | −0.0534 | 1.0052  | 0.1245  | 0.1017  |
| LW02  | 0.1495  | −1.3397 | 0.1037  | 0.0270  | −0.0508 | 0.0103  | 0.0382  |
| LW03  | 0.5722  | 0.0408  | 0.1710  | 0.0578  | 0.0037  | −0.2180 | −0.0289 |
| LW04  | 2.0343  | −2.2710 | 0.4902  | −0.0277 | 0.6946  | −0.0820 | 0.0845  |
| LW05  | −0.7382 | 1.0419  | −0.3758 | 0.0283  | 0.0452  | 0.1608  | 0.0061  |
| LW06  | −0.7243 | 0.8132  | −0.8419 | 0.0515  | −0.0595 | −0.1709 | −0.0557 |
| LW07  | 3.7497  | −0.4517 | 0.3777  | −0.0110 | −0.2276 | −0.1455 | −0.0330 |
| LW08  | −1.6346 | −0.0416 | −0.1366 | 0.0043  | 0.0904  | 0.0485  | −0.0069 |

**Table S4.** Weight and bias between input layer and hidden layer (BPNN<sub>2</sub>) for Dim1 prediction.

| Term  | LW01    | LW02    | LW03    | LW04    | LW05    | LW06    | LW07    | LW08    |
|-------|---------|---------|---------|---------|---------|---------|---------|---------|
| Bias1 | −0.7468 | 0.3184  | 0.0573  | −0.2186 | 0.3463  | 0.8486  | 0.0132  | 0.8802  |
| I1    | −0.5113 | 0.1047  | −0.0316 | 0.4027  | 0.1993  | −0.4599 | 0.3319  | −0.4308 |
| I2    | −0.1853 | −0.1203 | −0.0433 | −0.5106 | 0.9391  | 1.0791  | −0.2795 | 0.7238  |
| I3    | −0.2639 | −0.3525 | 0.4638  | −0.1668 | 0.5566  | 0.6589  | −0.0297 | 0.1610  |
| I4    | −0.1053 | 0.4661  | −0.1645 | −0.8845 | −0.0311 | −0.5038 | −0.1787 | −0.1926 |
| I5    | −0.3390 | −0.5927 | 0.1499  | −0.1913 | 0.6231  | 0.6757  | 0.2161  | 0.2834  |
| I6    | 0.0774  | −0.3079 | 0.0079  | 0.1199  | −0.0902 | 0.0132  | −0.3906 | 0.0105  |
| I7    | −0.2488 | 0.0876  | −0.4514 | −0.1115 | 0.3652  | 0.0752  | −0.4278 | −0.1039 |
| I8    | 0.0074  | 0.0237  | 0.1092  | −0.1101 | 0.0709  | −0.0559 | −0.0041 | −0.1968 |

**Table S5.** Weight and bias between hidden layer and output layer (BPNN<sub>2</sub>) for Dim1 prediction.

| Term  | OW01    |
|-------|---------|
| Bias2 | 0.2547  |
| LW01  | −0.8602 |
| LW02  | 0.7260  |
| LW03  | −0.7130 |
| LW04  | 0.6339  |
| LW05  | −0.7852 |
| LW06  | 0.9200  |
| LW07  | 0.4977  |
| LW08  | 0.9989  |

**Table S6.** Weight and bias between input layer and hidden layer (BPNN<sub>3</sub>).

| Term  | LW01    | LW02    | LW03    | LW04    | LW05    | LW06    | LW07    | LW08    | LW09    | LW10    | LW11    | LW12    |
|-------|---------|---------|---------|---------|---------|---------|---------|---------|---------|---------|---------|---------|
| Bias1 | −1,2543 | −1,3880 | −0,0124 | −0,3607 | 0,1781  | −0,0755 | 0,2098  | 1,1296  | −0,1348 | 1,6098  | 1,5830  | 0,0565  |
| I1    | −0,3269 | 0,9552  | 0,1122  | 0,3297  | −0,1491 | 0,0976  | −0,0316 | 0,6315  | −0,1026 | −1,1035 | −0,8216 | 0,7732  |
| I2    | 0,4811  | −0,9875 | −0,1151 | −0,4785 | 0,5669  | 0,9545  | −0,4838 | −0,6665 | −3,6050 | 0,8587  | 0,5052  | −0,3642 |
| I3    | 0,2651  | −0,7841 | −0,0069 | 0,7101  | 0,0327  | −1,1708 | −0,7095 | 0,0840  | −0,7548 | 0,6409  | 0,6541  | −0,1354 |
| I4    | −1,3950 | −0,5356 | 0,1008  | 0,0137  | −0,0071 | 0,1714  | −0,5262 | 0,0143  | 3,3102  | 0,4920  | −0,0254 | −0,3212 |
| I5    | 0,0249  | −0,2346 | 0,7613  | 0,0989  | 0,0566  | 0,0500  | 0,1705  | 0,0247  | 0,0943  | 0,1815  | 0,1193  | 0,3630  |
| I6    | 0,0328  | 0,2395  | 0,1816  | −0,3913 | −0,0010 | 0,2786  | 0,1681  | −0,0634 | 0,0574  | −0,1519 | −0,2128 | −0,7780 |
| I7    | −0,0426 | 0,2393  | −0,1839 | −0,1436 | −0,1767 | 0,8098  | −0,2985 | 0,3657  | −0,9702 | −0,5392 | 0,6421  | 0,1685  |
| I8    | −0,1147 | −0,3548 | 0,0840  | 0,2869  | 0,1282  | −0,2117 | −0,0813 | 0,0310  | −0,1684 | 0,4266  | −0,0721 | −0,3746 |

| Term  | LW13   | LW14    | LW15    | LW16    | LW17    | LW18    | LW19   | LW20    | LW21    | LW22    | LW23    | LW24    |
|-------|--------|---------|---------|---------|---------|---------|--------|---------|---------|---------|---------|---------|
| Bias1 | 0,1636 | 0,5309  | −2,8384 | 0,2026  | −0,6618 | −0,6477 | 0,5657 | 0,6819  | 0,7306  | 1,0678  | −0,2685 | 0,0245  |
| I1    | 0,0756 | −0,5003 | 2,1556  | −0,1452 | 0,3302  | −0,0102 | 0,3638 | −0,1280 | 0,3967  | 0,0014  | −0,7218 | −0,0079 |
| I2    | 0,4360 | −0,0199 | −1,9842 | −0,4607 | 0,3730  | −0,2947 | 0,1475 | −0,1728 | −0,5981 | −0,4017 | 0,1238  | −0,0149 |

|    |         |         |         |         |         |         |         |         |         |         |         |         |
|----|---------|---------|---------|---------|---------|---------|---------|---------|---------|---------|---------|---------|
| I3 | −0,4449 | 0,1943  | −0,9802 | 0,2778  | 0,0897  | 0,0448  | 0,3416  | −1,1086 | 0,0884  | −0,4226 | 0,2150  | −0,0095 |
| I4 | 0,0530  | −0,3686 | 0,1260  | −0,1340 | −0,4532 | 0,6038  | 0,5780  | −0,6137 | −0,0068 | −0,2781 | −0,0468 | 0,0004  |
| I5 | −0,0430 | −0,2124 | −0,0250 | −0,1812 | 0,1171  | 0,1529  | 0,0792  | 0,2253  | 0,0572  | −0,0929 | 0,1071  | −0,0189 |
| I6 | 0,0543  | 0,1252  | 0,1330  | 0,0351  | 0,0102  | −0,0421 | −0,0993 | 0,1157  | −0,0694 | 0,0647  | 0,0005  | 0,0020  |
| I7 | 0,1242  | −0,8582 | −2,4138 | 0,3328  | 0,0770  | 0,6865  | −0,0841 | 1,8125  | 0,8775  | 1,3048  | −0,6705 | −0,6165 |
| I8 | 0,0738  | 0,5501  | 0,1396  | 0,1223  | 0,1115  | −0,0646 | 0,1276  | 0,0581  | 0,1738  | 0,6877  | −0,5183 | −0,0973 |

**Table S7.** Weight and bias between hidden layer and output layer (BPNN<sub>3</sub>).

| Term  | OW01    | OW02    | OW03    | OW04    | OW05    | OW06    | OW07    |
|-------|---------|---------|---------|---------|---------|---------|---------|
| Bias2 | 0,1693  | 0,3751  | 0,8799  | −0,0530 | 0,0030  | 0,0933  | −0,1650 |
| LW01  | −0,0443 | −0,2341 | 0,5504  | 0,0868  | −0,0077 | 0,1164  | −0,3714 |
| LW02  | −0,0268 | −0,8885 | −0,1363 | 0,0367  | −0,0008 | −0,3536 | 0,0838  |
| LW03  | −0,0254 | 0,2393  | −0,5063 | −0,6206 | 0,0147  | 0,5418  | 0,6848  |
| LW04  | −0,3670 | −0,0787 | −0,3858 | −0,0244 | −0,0068 | 0,0920  | 0,0128  |
| LW05  | 0,9214  | −0,8435 | 1,3868  | −0,1641 | 0,0274  | 0,3423  | 0,2969  |
| LW06  | −0,2380 | −0,0618 | 0,0545  | −0,0846 | −0,0059 | −0,0401 | 0,0496  |
| LW07  | −0,1343 | −0,3862 | −0,0891 | −0,0428 | 0,0195  | 0,2156  | 0,1816  |
| LW08  | −1,0093 | −0,0151 | −0,1172 | 0,1262  | −0,0072 | −0,1321 | −0,3045 |
| LW09  | 0,0087  | 0,0189  | 0,6335  | 0,0618  | −0,0033 | −0,1098 | −0,1159 |
| LW10  | −0,0354 | −1,0141 | −0,3032 | 0,0653  | −0,0039 | −0,2953 | 0,0147  |
| LW11  | −0,3333 | −0,5153 | 0,0669  | 0,1178  | −0,0042 | −0,0877 | 0,1183  |
| LW12  | 0,0925  | 0,1758  | 0,0201  | −0,1146 | 0,0026  | 0,0798  | 0,1400  |
| LW13  | 0,1571  | 0,8769  | −0,5865 | −0,0342 | 0,0005  | −0,1625 | −0,0533 |
| LW14  | −0,1283 | 0,4491  | −0,2318 | −0,0091 | −0,0075 | −0,0417 | −0,0212 |
| LW15  | −0,2674 | −0,0594 | 0,1815  | −0,0254 | −0,0038 | −0,0026 | 0,0663  |
| LW16  | 0,2757  | 0,5436  | 0,0232  | 0,1356  | 0,0043  | −0,0610 | −0,1840 |
| LW17  | 0,0980  | 0,3688  | 0,5013  | 0,0260  | −0,0307 | −0,3305 | −0,0511 |
| LW18  | 0,0786  | 0,5214  | −0,1702 | −0,0226 | 0,0090  | 0,0794  | 0,2416  |
| LW19  | −0,1311 | −0,6705 | 0,0774  | −0,0781 | −0,0011 | 0,3502  | 0,0669  |
| LW20  | −0,1947 | −0,3626 | 0,0778  | −0,1602 | 0,0098  | 0,2323  | 0,0729  |
| LW21  | 1,0104  | 0,3322  | −0,4763 | −0,0908 | 0,0251  | 0,3955  | 0,1855  |
| LW22  | −0,2198 | 0,3308  | −0,1879 | −0,0381 | −0,0036 | −0,2909 | 0,0108  |
| LW23  | 0,2133  | 0,5620  | −0,4426 | −0,0670 | 0,0000  | −0,0267 | 0,1786  |
| LW24  | −0,3170 | 0,7958  | −0,4804 | 0,0309  | −1,5373 | −0,1368 | −0,1699 |
